# Supplementary material
Source: Royal Society of Chemistry journal article supplement (doi:10.1039/d6ja00062b)
Supplement: d6ja00062b1.pdf [file d6ja00062b1.pdf]

## ELECTRONIC SUPPLEMENTARY MATERIAL

### Single- and dual-isotopic analysis using high-resolution continuum-source graphite-furnace molecular absorption. Strategies for data selection, processing, and modeling

André L. M. de Souza,<sup>a</sup> Maite Aramendía,<sup>a\*</sup> Esperanza García-Ruiz,<sup>a</sup> Flávio V. Nakadi,<sup>a</sup> Javier Resano,<sup>b</sup> Martín Resano<sup>a\*</sup>

<sup>a</sup> Department of Analytical Chemistry, Aragon Institute of Engineering Research (I3A), University of Zaragoza, Pedro Cerbuna 12, 50009 Zaragoza, Spain.

<sup>b</sup> University of Zaragoza, Department of Computer Science and Systems Engineering, Aragon Institute of Engineering Research (I3A), Zaragoza, 50018, Spain

\*Corresponding author: mresano@unizar.es; maiteam@unizar.es

**Table S1.** Results of the ANOVA carried out (see section 3.2) for a <sup>44</sup>Ca/<sup>Ca</sup>40 ratio of approximately 1. A p-value below 0.05 indicates that the difference is statistically significant.

| Ca content (mg L <sup>-1</sup> ) | p (detector pixels)   | p (signal processing) |
|----------------------------------|-----------------------|-----------------------|
| 200                              | 0.289                 | 0.320                 |
| 400                              | 0.298                 | 0.001                 |
| 600                              | 3.90 10 <sup>-7</sup> | 8.81 10 <sup>-6</sup> |
| 800                              | 6.14 10 <sup>-5</sup> | 0.343                 |
| 1000                             | 1.42 10 <sup>-5</sup> | 0.906                 |

**Table S2.** Results of the ANOVA carried out (see section 3.2) for a <sup>44</sup>Ca/<sup>Ca</sup>40 ratio of approximately 0.25. A p-value below 0.05 indicates that the difference is statistically significant.

| Ca content (mg L <sup>-1</sup> ) | p (detector pixels)   | p (signal processing) |
|----------------------------------|-----------------------|-----------------------|
| 200                              | 2.47 10 <sup>-5</sup> | 0.063                 |
| 400                              | 5.41 10 <sup>-7</sup> | 0.005                 |
| 600                              | 4.30 10 <sup>-8</sup> | 0.991                 |
| 800                              | 1.27 10 <sup>-8</sup> | 0.900                 |
| 1000                             | 4.13 10 <sup>-7</sup> | 0.035                 |

**Table S3.** Results of the ANOVA carried out (see section 3.2) for a  $^{44}\text{Ca}/\text{Ca}40$  ratio of approximately 4. A p-value below 0.05 indicates that the difference is statistically significant.

| <b>Ca content (mg L<sup>-1</sup>)</b> | <b>p (detector pixels)</b> | <b>p (signal processing)</b> |
|---------------------------------------|----------------------------|------------------------------|
| 200                                   | 0.005                      | 0.007                        |
| 400                                   | $2.07 \cdot 10^{-7}$       | $4.24 \cdot 10^{-5}$         |
| 600                                   | $1.69 \cdot 10^{-4}$       | 0.746                        |
| 800                                   | $2.56 \cdot 10^{-6}$       | 0.003                        |
| 1000                                  | $1.02 \cdot 10^{-5}$       | $6.11 \cdot 10^{-5}$         |
